# Supplementary material for: Can a linear metal–metal bonded array of tetravanadium be stabilized between two dicyclopenta[a,e]pentalene ligands? A theoretical investigation
Source: Royal Society of Chemistry journal article supplement (doi:10.1039/c3nj00857f), 2013-11-22
Supplement: c3nj00857f.pdf [file c3nj00857f.pdf]

**Electronic Supplementary Material (ESI) for New Journal of Chemistry**

This journal is © The Royal Society of Chemistry and The Centre National de la Recherche Scientifique 2013

# **Can a Linear Metal–Metal Bonded Array of Tetravanadium Be Stabilized between Two Dicyclopenta[a,e]pentalene Ligands? A Theoretical Investigation**

**Yan-Chun Liu,<sup>a,b</sup> Shui-Xing Wu,<sup>c</sup> Zhong-Min Su<sup>\*a,c</sup> and Hou-Yu Zhang<sup>\*a</sup>**

<sup>a</sup> *State key laboratory of supramolecular structure and materials, Jilin University, Changchun 130012, P. R. China. E-mail: zmsu@nenu.edu.cn; houyuzhang@jlu.edu.cn*

<sup>b</sup> *College of Chemistry & Chemical Engineering, Hainan Normal University, Haikou 571158, P. R. China.*

<sup>c</sup> *Institution of Functional Material Chemistry, Department of Chemistry, Northeast Normal University, Changchun 130024, P. R. China. Fax: (+86)-431-85684009*

- (1) Diagrams for molecular orbitals**
- (2) The bond distances and the bond indices for vanadium-carbon**
- (3) Gibbs free energy change in the related reference reactions**
- (4) List of the Cartesian coordinates and the lowest five frequencies for studied complexes**

## Electronic Supplementary Material (ESI) for New Journal of Chemistry

This journal is © The Royal Society of Chemistry and The Centre National de la Recherche Scientifique 2013

### (1) Diagrams for molecular orbitals

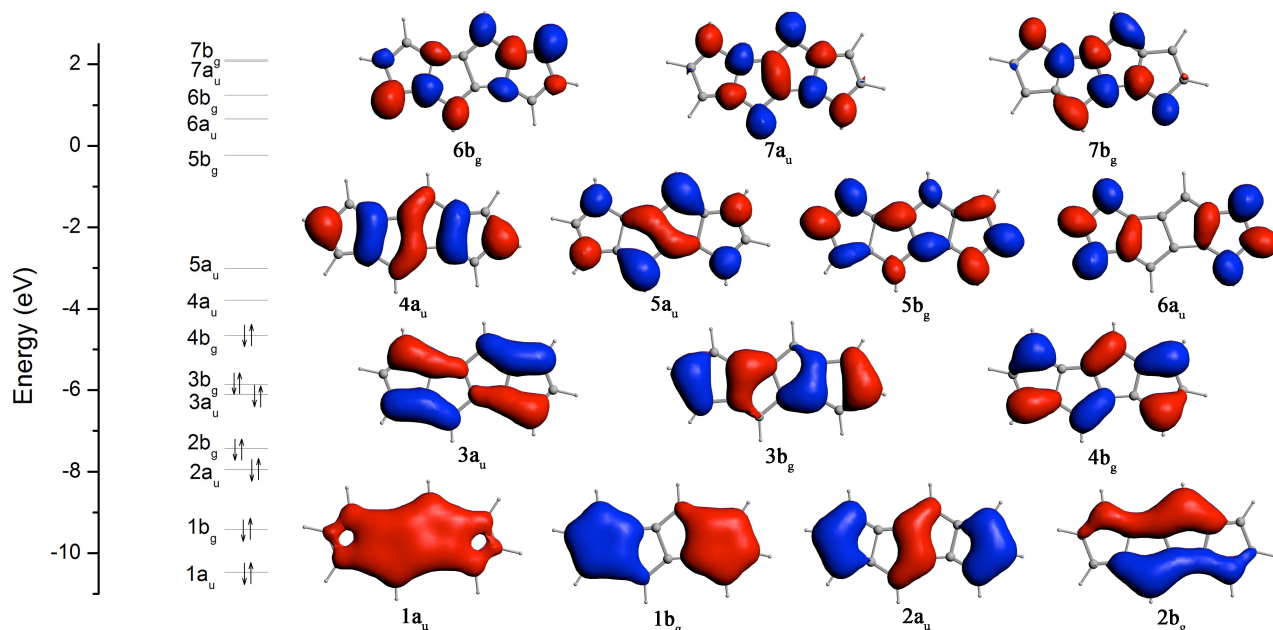

**Fig. S1** The frontier molecular orbitals (FMOs) within  $\pi$  symmetry and their energy levels for dcpp.

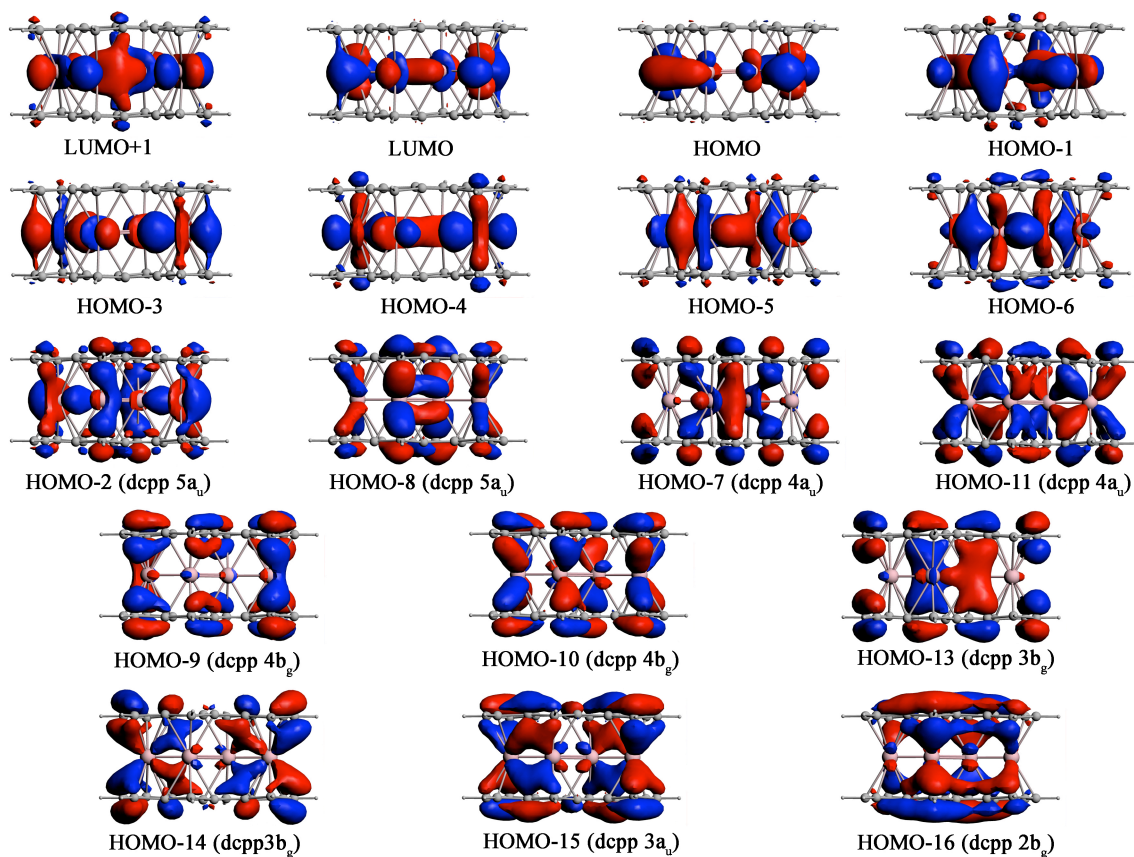

**Fig. S2** The FMOs of **1a-S** with explicit contributions from the occupied dcpp ligand orbitals (HOMO-16, HOMO-15, HOMO-14, HOMO-13, HOMO-10 and HOMO-9), from the unoccupied dcpp ligand orbitals (HOMO-11, HOMO-7, HOMO-8 and HOMO-2) and from almost only vanadium atoms. (The respective dcpp orbitals are labeled in the parentheses except for unoccupied complex FMOs)

## Electronic Supplementary Material (ESI) for New Journal of Chemistry

This journal is © The Royal Society of Chemistry and The Centre National de la Recherche Scientifique 2013

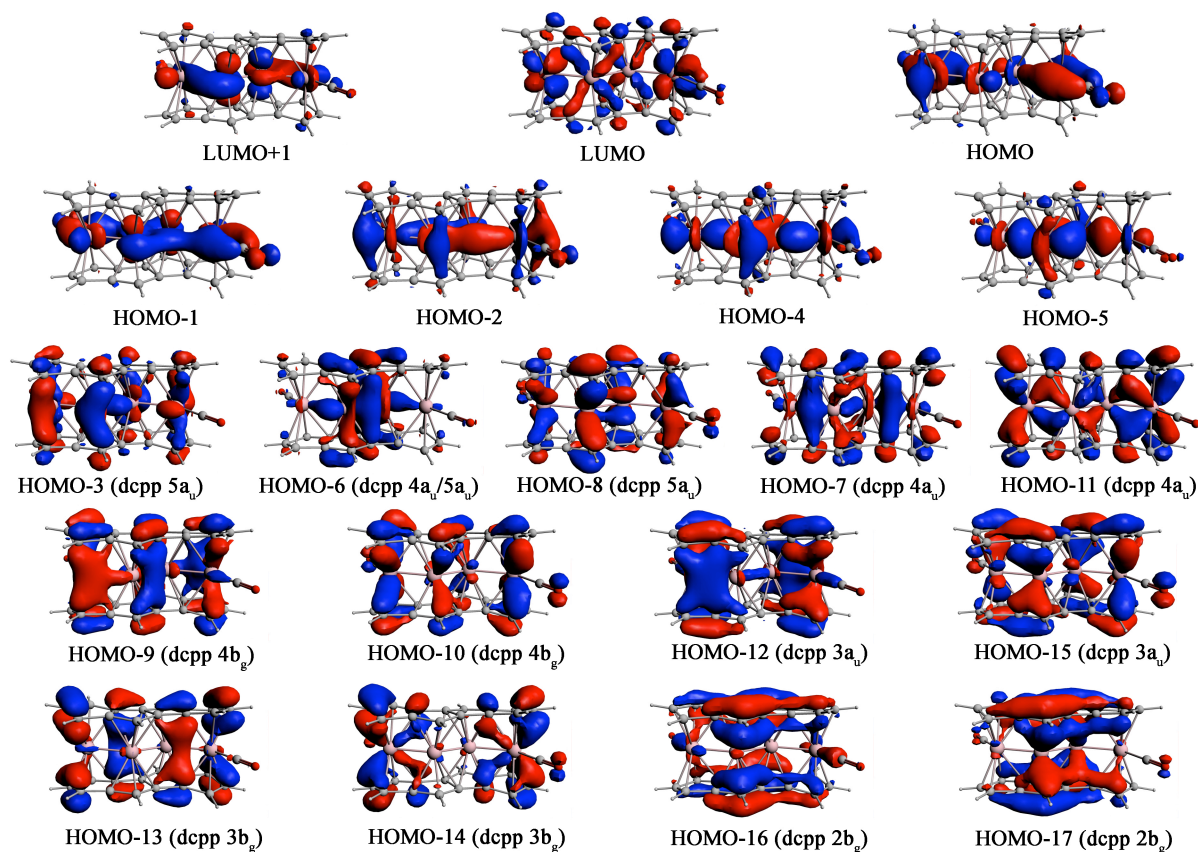

**Fig. S3** The FMOs of **3a-cis-S** with explicit contributions from the occupied dcpp ligand orbitals (HOMO-17, HOMO-16, HOMO-15, HOMO-14, HOMO-13, HOMO-12, HOMO-10 and HOMO-9), from the unoccupied dcpp ligand orbitals (HOMO-11, HOMO-7, HOMO-8, HOMO-6 and HOMO-3) and from almost only vanadium atoms. (The respective dcpp orbitals are labeled in the parentheses except for unoccupied complex FMOs)

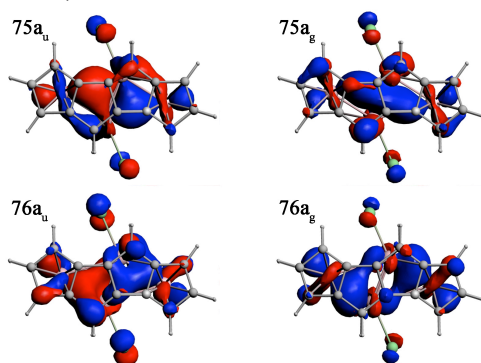

**Fig. S4** The four occupied MOs related to the multicenter bonding of the tetravanadium moiety in (dcpp)<sub>2</sub>V<sub>4</sub>Cl<sub>2</sub>. (only alpha spin orbitals shown)

**Electronic Supplementary Material (ESI) for New Journal of Chemistry**

This journal is © The Royal Society of Chemistry and The Centre National de la Recherche Scientifique 2013

**(2) The bond distances and the bond indices for vanadium-carbon**

**Table S1** The bond distances and the bond indices (whose print threshold were set to 0.05) of all vanadium-carbon bonds in the selected minimum structures of (dcpp)<sub>2</sub>V<sub>4</sub>, (dcpp)<sub>2</sub>V<sub>4</sub>Cl<sub>2</sub> and (dcpp)<sub>2</sub>V<sub>4</sub>(CO)<sub>2</sub>. (The data in the second low for each vanadium-carbon bond is for the carbon atom from the second dcpp ligand when they are different from the data for carbon atom from the first dcpp ligand. Based on these data, it could be concluded that delocalized interactions exist between vanadium-carbon.)

|        | <b>1c-T</b>   |            | <b>2a-trans-T</b> |            | <b>2b-T</b>   |            | <b>3a-cis-S</b> |            | <b>3b-T</b>   |            |
|--------|---------------|------------|-------------------|------------|---------------|------------|-----------------|------------|---------------|------------|
|        | Bond distance | Bond index | Bond distance     | Bond index | Bond distance | Bond index | Bond distance   | Bond index | Bond distance | Bond index |
| V1-C1  | 2.257         | 0.31       | 2.324             | 0.41       | 2.245         | 0.36       | 2.244           | 0.40       | 2.251         | 0.34       |
|        |               |            |                   |            | 2.303         | 0.33       |                 |            | 2.251         | 0.34       |
| V1-C2  | 2.274         | 0.29       | 2.323             | 0.23       | 2.268         | 0.28       | 2.257           | 0.31       | 2.235         | 0.35       |
|        |               |            |                   |            | 2.272         | 0.31       |                 |            | 2.235         | 0.35       |
| V1-C3  | 2.281         | 0.30       | 2.325             | 0.40       | 2.286         | 0.37       | 2.326           | 0.40       | 2.271         | 0.38       |
|        |               |            |                   |            | 2.215         | 0.40       |                 |            | 2.271         | 0.38       |
| V1-C4  | 2.260         | 0.25       | 2.401             | 0.20       | 2.341         | 0.21       | 2.547           | 0.17       | 2.341         | 0.23       |
|        |               |            |                   |            | 2.205         | 0.27       |                 |            | 2.341         | 0.23       |
| V1-C14 | 2.245         | 0.256      | 2.453             | 0.21       | 2.273         | 0.23       | 2.384           | 0.20       | 2.276         | 0.28       |
|        |               |            |                   |            | 2.276         | 0.27       |                 |            | 2.276         | 0.28       |
| V2-C4  | 2.387         | 0.19       | 2.263             | 0.21       | 2.353         | 0.24       | 2.214           | 0.22       | 2.567         | 0.12       |
|        |               |            |                   |            | 2.952         | 0.07       |                 |            | 2.568         | 0.12       |
| V2-C5  | 2.055         | 0.68       | 2.151             | 0.49       | 2.141         | 0.45       | 2.148           | 0.47       | 2.202         | 0.41       |
|        |               |            |                   |            | 2.337         | 0.33       |                 |            | 2.202         | 0.41       |
| V2-C6  | 2.415         | 0.21       | 2.256             | 0.20       | 2.208         | 0.27       | 2.267           | 0.21       | 2.226         | 0.28       |
|        |               |            |                   |            | 2.410         | 0.18       |                 |            | 2.226         | 0.28       |
| V2-C13 | 2.980         | –          | 2.443             | 0.18       | 2.557         | 0.13       | 2.323           | 0.21       | 2.545         | 0.15       |
|        |               |            |                   |            | 3.111         | –          |                 |            | 2.545         | 0.15       |
| V2-C14 | 2.933         | 0.07       | 2.311             | 0.20       | 2.678         | 0.12       | 2.300           | 0.21       | 2.870         | 0.05       |
|        |               |            |                   |            | 3.325         | –          |                 |            | 2.870         | 0.05       |
| V3-C6  | 2.290         | 0.26       | 2.443             | 0.18       | 3.111         | –          | 2.323           | 0.21       | 3.167         | –          |
|        |               |            |                   |            | 2.557         | 0.13       |                 |            | 3.167         | –          |
| V3-C7  | 2.411         | 0.18       | 2.311             | 0.20       | 3.325         | –          | 2.300           | 0.21       | 3.388         | –          |
|        |               |            |                   |            | 2.678         | 0.12       |                 |            | 3.388         | –          |
| V3-C11 | 2.355         | 0.20       | 2.263             | 0.21       | 2.952         | 0.07       | 2.214           | 0.22       | 2.779         | 0.07       |
|        |               |            |                   |            | 2.353         | 0.24       |                 |            | 2.779         | 0.07       |
| V3-C12 | 2.224         | 0.40       | 2.151             | 0.49       | 2.337         | 0.33       | 2.148           | 0.47       | 2.130         | 0.56       |
|        |               |            |                   |            | 2.141         | 0.45       |                 |            | 2.130         | 0.56       |
| V3-C13 | 2.237         | 0.28       | 2.256             | 0.20       | 2.410         | 0.18       | 2.267           | 0.21       | 2.414         | 0.16       |
|        |               |            |                   |            | 2.208         | 0.27       |                 |            | 2.414         | 0.16       |
| V4-C7  | 2.277         | 0.21       | 2.453             | 0.21       | 2.276         | 0.27       | 2.384           | 0.20       | 2.235         | 0.32       |
|        |               |            |                   |            | 2.273         | 0.23       |                 |            | 2.235         | 0.32       |
| V4-C8  | 2.250         | 0.36       | 2.324             | 0.41       | 2.303         | 0.33       | 2.244           | 0.40       | 2.219         | 0.36       |
|        |               |            |                   |            | 2.245         | 0.36       |                 |            | 2.219         | 0.36       |
| V4-C9  | 2.255         | 0.27       | 2.323             | 0.23       | 2.272         | 0.31       | 2.257           | 0.31       | 2.239         | 0.35       |
|        |               |            |                   |            | 2.268         | 0.28       |                 |            | 2.239         | 0.35       |
| V4-C10 | 2.223         | 0.39       | 2.325             | 0.40       | 2.215         | 0.40       | 2.326           | 0.40       | 2.315         | 0.33       |
|        |               |            |                   |            | 2.286         | 0.37       |                 |            | 2.315         | 0.33       |
| V4-C11 | 2.276         | 0.22       | 2.401             | 0.20       | 2.205         | 0.27       | 2.547           | 0.17       | 2.357         | 0.22       |
|        |               |            |                   |            | 2.341         | 0.21       |                 |            | 2.357         | 0.22       |



## Electronic Supplementary Material (ESI) for New Journal of Chemistry

This journal is © The Royal Society of Chemistry and The Centre National de la Recherche Scientifique 2013

### (3) Gibbs free energy change in the related reference reactions

**Table S2** Gibbs free energy change (in kcal/mol) in the related reactions.

| molecule                | reference reaction                                                       | $\Delta_r G(\text{gas})^a$ | $\Delta_r G(\text{THF})^{b,c}$ | $\Delta_r G(\text{n-hexane})^{b,d}$ |
|-------------------------|--------------------------------------------------------------------------|----------------------------|--------------------------------|-------------------------------------|
| $\text{Pn}_2\text{V}_2$ | $2 \text{V} + 2 \text{Pn} \rightarrow \text{Pn}_2\text{V}_2$             | -308.8                     |                                |                                     |
| <b>1c-T</b>             | $4 \text{V} + 2 \text{dcpp} \rightarrow \mathbf{1c-T}$                   | -550.9                     |                                |                                     |
| <b>2b-T</b>             | $4 \text{V} + 2 \text{dcpp} + \text{Cl}_2 \rightarrow \mathbf{2b-T}$     | -637.8                     |                                |                                     |
|                         | $\mathbf{1c-T} + \text{Cl}_2 \rightarrow \mathbf{2b-T}$                  | -86.8                      | -86.4                          | -86.9                               |
| <b>3a-cis-S</b>         | $4 \text{V} + 2 \text{dcpp} + 2 \text{CO} \rightarrow \mathbf{3a-cis-S}$ | -548.5                     |                                |                                     |
|                         | $\mathbf{1c-T} + 2 \text{CO} \rightarrow \mathbf{3a-cis-S}$              | 2.4                        | -4.0                           | -0.4                                |
| <b>3b-T</b>             | $4 \text{V} + 2 \text{dcpp} + 2 \text{CO} \rightarrow \mathbf{3b-T}$     | -563.2                     |                                |                                     |
|                         | $\mathbf{1c-T} + 2 \text{CO} \rightarrow \mathbf{3b-T}$                  | -12.3                      | -20.2                          | -20.1                               |

<sup>a</sup> The Gibbs free energy of atom vanadium was calculated based on the electronic configuration  $3d^3 4s^2$ . <sup>b</sup> The free energy in solution was calculated using the equation  $G(\text{soln}) = G(\text{gas}) + \Delta G(1\text{atm} \rightarrow 1\text{M}) + \Delta G_{\text{solv}}$ , where  $\Delta G(1\text{atm} \rightarrow 1\text{M})$  for the standard state transformation is 1.89 kcal/mol and  $\Delta G_{\text{solv}}$  is the solvation free energy and was calculated via SMD<sup>S1</sup> parameterized PCM solvation model implemented in G09<sup>S2</sup> (at the level of B-VP86/def2-TZVPP<sup>S3</sup>). <sup>c</sup> Using the parameters for the solvent tetrahydrofuran. <sup>d</sup> Using the parameters for the solvent n-hexane.

- S1. A.V. Marenich, C.J. Cramer and D.G. Truhlar, *J. Phys. Chem. B* 113 (2009) 6378-6396.
- S2. M. J. Frisch, G. W. Trucks, H. B. Schlegel, G. E. Scuseria, M. A. Robb, J. R. Cheeseman, G. Scalmani, V. Barone, B. Mennucci, G. A. Petersson, H. Nakatsuji, M. Caricato, X. Li, H. P. Hratchian, A. F. Izmaylov, J. Bloino, G. Zheng, J. L. Sonnenberg, M. Hada, M. Ehara, K. Toyota, R. Fukuda, J. Hasegawa, M. Ishida, Y. Honda, O. Kitao, H. Nakai, T. Vreven, J. J. A. Montgomery, J. E. Peralta, F. Ogliaro, M. Bearpark, J. J. Heyd, E. Brothers, K. N. Kudin, V. N. Staroverov, R. Kobayashi, K. Raghavachari, A. Rendell, J. C. Burant, S. S. Iyengar, J. Tomasi, M. Cossi, N. Rega, J. M. Millam, M. Klene, J. B. Cross, V. Bakken, C. Adamo, J. Jaramillo, R. Gomperts, R. E. Stratmann, O. Yazyev, A. J. Austin, R. Cammi, C. Pomelli, J. W. Ochterski, R. L. Martin, K. Morokuma, V. G. Zakrzewski, G. A. Voth, P. Salvador, J. J. Dannenberg, S. Dapprich, A. D. Daniels, O. Farkas, J. B. Foresman, J. V. Ortiz, J. Cioslowski and D. J. Fox, Gaussian 09W, Revision A.02, Gaussian, Inc., Wallingford CT, 2009.
- S3. F. Weigend and R. Ahlrichs *Phys. Chem. Chem. Phys.*, 2005,7, 3297-3305

## Electronic Supplementary Material (ESI) for New Journal of Chemistry

This journal is © The Royal Society of Chemistry and The Centre National de la Recherche Scientifique 2013

### (4) List of the Cartesian coordinates and the lowest five frequencies:

#### 1a-S

|   |           |           |           |
|---|-----------|-----------|-----------|
| V | 2.851490  | -0.107331 | 0.000000  |
| V | -2.851490 | 0.107331  | 0.000000  |
| V | 0.903134  | 0.753795  | 0.000000  |
| V | -0.903134 | -0.753795 | 0.000000  |
| C | 4.002135  | -0.421687 | -1.920924 |
| C | 2.915786  | -1.359468 | -1.850018 |
| C | 3.501023  | 0.910733  | -1.923737 |
| C | 1.705832  | -0.587768 | -1.942844 |
| C | 2.060144  | 0.828956  | -1.975021 |
| C | 4.002135  | -0.421687 | 1.920924  |
| C | 3.501023  | 0.910733  | 1.923737  |
| C | 2.915786  | -1.359468 | 1.850018  |
| C | 2.060144  | 0.828956  | 1.975021  |
| C | 1.705832  | -0.587768 | 1.942844  |
| H | 5.054873  | -0.691338 | -1.910353 |
| H | 3.001351  | -2.440033 | -1.860360 |
| H | 4.096910  | 1.816398  | -1.952796 |
| H | 5.054873  | -0.691338 | 1.910353  |
| H | 4.096910  | 1.816398  | 1.952796  |
| H | 3.001351  | -2.440033 | 1.860360  |
| C | -0.253461 | 0.681188  | -1.992618 |
| C | 0.835350  | 1.646597  | -1.919157 |
| C | 0.253461  | -0.681188 | -1.992618 |
| C | -0.253461 | 0.681188  | 1.992618  |
| C | 0.253461  | -0.681188 | 1.992618  |
| C | 0.835350  | 1.646597  | 1.919157  |
| H | 0.766257  | 2.710288  | -2.116577 |
| H | 0.766257  | 2.710288  | 2.116577  |
| C | -2.060144 | -0.828956 | -1.975021 |
| C | -1.705832 | 0.587768  | -1.942844 |
| C | -0.835350 | -1.646597 | -1.919157 |
| C | -2.060144 | -0.828956 | 1.975021  |
| C | -0.835350 | -1.646597 | 1.919157  |
| C | -1.705832 | 0.587768  | 1.942844  |
| H | -0.766257 | -2.710288 | -2.116577 |
| H | -0.766257 | -2.710288 | 2.116577  |
| C | -4.002135 | 0.421687  | -1.920924 |
| C | -2.915786 | 1.359468  | -1.850018 |
| C | -3.501023 | -0.910733 | -1.923737 |
| C | -4.002135 | 0.421687  | 1.920924  |

## Electronic Supplementary Material (ESI) for New Journal of Chemistry

This journal is © The Royal Society of Chemistry and The Centre National de la Recherche Scientifique 2013

|   |           |           |           |
|---|-----------|-----------|-----------|
| C | -3.501023 | -0.910733 | 1.923737  |
| C | -2.915786 | 1.359468  | 1.850018  |
| H | -3.001351 | 2.440033  | -1.860360 |
| H | -3.001351 | 2.440033  | 1.860360  |
| H | -5.054873 | 0.691338  | -1.910353 |
| H | -5.054873 | 0.691338  | 1.910353  |
| H | -4.096910 | -1.816398 | -1.952796 |
| H | -4.096910 | -1.816398 | 1.952796  |

### Intensities

=====

| Frequency<br>cm <sup>-1</sup> | Dipole Strength<br>1e-40 esu <sup>2</sup> cm <sup>2</sup> | Absorption Intensity<br>km/mole |
|-------------------------------|-----------------------------------------------------------|---------------------------------|
| -----                         | -----                                                     | -----                           |
| -84.682118                    | 35.149944                                                 | -0.746095                       |
| 86.271094                     | 2.367576                                                  | 0.051197                        |
| 104.062825                    | 0.000000                                                  | 0.000000                        |
| 125.696235                    | 0.000000                                                  | 0.000000                        |
| 134.596906                    | 30.119241                                                 | 1.016148                        |

### 1a-T

|   |           |           |           |
|---|-----------|-----------|-----------|
| V | 2.725004  | -0.190458 | 0.000000  |
| V | -2.725004 | 0.190458  | 0.000000  |
| V | -0.766498 | -0.861677 | 0.000000  |
| V | 0.766498  | 0.861677  | 0.000000  |
| C | 3.988708  | -0.446230 | -1.863595 |
| C | 2.894533  | -1.371389 | -1.917753 |
| C | 3.494853  | 0.891318  | -1.831102 |
| C | 1.698309  | -0.594472 | -2.000141 |
| C | 2.057577  | 0.825085  | -1.945700 |
| C | 3.988708  | -0.446230 | 1.863595  |
| C | 3.494853  | 0.891318  | 1.831102  |
| C | 2.894533  | -1.371389 | 1.917753  |
| C | 2.057577  | 0.825085  | 1.945700  |
| C | 1.698309  | -0.594472 | 2.000141  |
| H | 5.037571  | -0.725748 | -1.823282 |
| H | 2.975790  | -2.452686 | -1.946198 |
| H | 4.101587  | 1.789805  | -1.790096 |
| H | 5.037571  | -0.725748 | 1.823282  |
| H | 4.101587  | 1.789805  | 1.790096  |

## Electronic Supplementary Material (ESI) for New Journal of Chemistry

This journal is © The Royal Society of Chemistry and The Centre National de la Recherche Scientifique 2013

|   |           |           |           |
|---|-----------|-----------|-----------|
| H | 2.975790  | -2.452686 | 1.946198  |
| C | -0.249516 | 0.676783  | -2.085944 |
| C | 0.831130  | 1.651482  | -1.952902 |
| C | 0.249516  | -0.676783 | -2.085944 |
| C | -0.249516 | 0.676783  | 2.085944  |
| C | 0.249516  | -0.676783 | 2.085944  |
| C | 0.831130  | 1.651482  | 1.952902  |
| H | 0.777890  | 2.704279  | -2.211046 |
| H | 0.777890  | 2.704279  | 2.211046  |
| C | -2.057577 | -0.825085 | -1.945700 |
| C | -1.698309 | 0.594472  | -2.000141 |
| C | -0.831130 | -1.651482 | -1.952902 |
| C | -2.057577 | -0.825085 | 1.945700  |
| C | -0.831130 | -1.651482 | 1.952902  |
| C | -1.698309 | 0.594472  | 2.000141  |
| H | -0.777890 | -2.704279 | -2.211046 |
| H | -0.777890 | -2.704279 | 2.211046  |
| C | -3.988708 | 0.446230  | -1.863595 |
| C | -2.894533 | 1.371389  | -1.917753 |
| C | -3.494853 | -0.891318 | -1.831102 |
| C | -3.988708 | 0.446230  | 1.863595  |
| C | -3.494853 | -0.891318 | 1.831102  |
| C | -2.894533 | 1.371389  | 1.917753  |
| H | -2.975790 | 2.452686  | -1.946198 |
| H | -2.975790 | 2.452686  | 1.946198  |
| H | -5.037571 | 0.725748  | -1.823282 |
| H | -5.037571 | 0.725748  | 1.823282  |
| H | -4.101587 | -1.789805 | -1.790096 |
| H | -4.101587 | -1.789805 | 1.790096  |

### Intensities

=====

| Frequency<br>cm <sup>-1</sup> | Dipole Strength<br>1e-40 esu <sup>2</sup> cm <sup>2</sup> | Absorption Intensity<br>km/mole |
|-------------------------------|-----------------------------------------------------------|---------------------------------|
| -----                         | -----                                                     | -----                           |
| -148.672919                   | 533.093359                                                | -19.866127                      |
| -58.223713                    | 0.000000                                                  | 0.000000                        |
| 83.761794                     | 2.473824                                                  | 0.051939                        |
| 112.470175                    | 0.000000                                                  | 0.000000                        |
| 124.331594                    | 200.804778                                                | 6.257972                        |



**Electronic Supplementary Material (ESI) for New Journal of Chemistry**

**This journal is © The Royal Society of Chemistry and The Centre National de la Recherche Scientifique 2013**

|   |           |           |           |
|---|-----------|-----------|-----------|
| V | 2.437401  | -0.028344 | 0.007478  |
| V | -2.437401 | 0.028344  | -0.007478 |
| V | 0.220332  | 1.027681  | -0.028168 |
| V | -0.220332 | -1.027681 | 0.028168  |
| C | 4.205236  | -0.390493 | -1.359108 |
| C | 3.179695  | -1.330669 | -1.679548 |
| C | 3.718800  | 0.947801  | -1.524668 |
| C | 2.061269  | -0.556120 | -2.115712 |
| C | 2.378172  | 0.848792  | -2.021499 |
| C | 3.633544  | -0.244417 | 1.850649  |
| C | 3.067654  | 1.075086  | 1.747724  |
| C | 2.606447  | -1.233859 | 1.965336  |
| C | 1.636923  | 0.895803  | 1.877368  |
| C | 1.353591  | -0.559250 | 2.015986  |
| H | 5.203537  | -0.648579 | -1.018112 |
| H | 3.267598  | -2.410666 | -1.658007 |
| H | 4.285095  | 1.852975  | -1.335307 |
| H | 4.694607  | -0.469855 | 1.794783  |
| H | 3.611912  | 2.011755  | 1.786440  |
| H | 2.763669  | -2.306518 | 2.009344  |
| C | 0.074062  | 0.707293  | -2.222653 |
| C | 1.149373  | 1.641697  | -2.015948 |
| C | 0.622159  | -0.666038 | -2.165035 |
| C | -0.622159 | 0.666038  | 2.165035  |
| C | -0.074062 | -0.707293 | 2.222653  |
| C | 0.397230  | 1.652520  | 2.019414  |
| H | 1.102541  | 2.720806  | -2.139572 |
| H | 0.311789  | 2.718442  | 2.208226  |
| C | -1.636923 | -0.895803 | -1.877368 |
| C | -1.353591 | 0.559250  | -2.015986 |
| C | -0.397230 | -1.652520 | -2.019414 |
| C | -2.378172 | -0.848792 | 2.021499  |
| C | -1.149373 | -1.641697 | 2.015948  |
| C | -2.061269 | 0.556120  | 2.115712  |
| H | -0.311789 | -2.718442 | -2.208226 |
| H | -1.102541 | -2.720806 | 2.139572  |
| C | -3.633544 | 0.244417  | -1.850649 |
| C | -2.606447 | 1.233859  | -1.965336 |
| C | -3.067654 | -1.075086 | -1.747724 |
| C | -4.205236 | 0.390493  | 1.359108  |
| C | -3.718800 | -0.947801 | 1.524668  |
| C | -3.179695 | 1.330669  | 1.679548  |
| H | -2.763669 | 2.306518  | -2.009344 |

## Electronic Supplementary Material (ESI) for New Journal of Chemistry

This journal is © The Royal Society of Chemistry and The Centre National de la Recherche Scientifique 2013

|   |           |           |           |
|---|-----------|-----------|-----------|
| H | -3.267598 | 2.410666  | 1.658007  |
| H | -4.694607 | 0.469855  | -1.794783 |
| H | -5.203537 | 0.648579  | 1.018112  |
| H | -3.611912 | -2.011755 | -1.786440 |
| H | -4.285095 | -1.852975 | 1.335307  |

### Intensities

=====

| Frequency<br>cm <sup>-1</sup> | Dipole Strength<br>1e-40 esu <sup>2</sup> cm <sup>2</sup> | Absorption Intensity<br>km/mole |
|-------------------------------|-----------------------------------------------------------|---------------------------------|
| -----                         | -----                                                     | -----                           |
| 48.581145                     | 70.788826                                                 | 0.862006                        |
| 64.584400                     | 37.383900                                                 | 0.605188                        |
| 116.620736                    | 0.000000                                                  | 0.000000                        |
| 133.782270                    | 16.676272                                                 | 0.559211                        |
| 146.425566                    | 0.000000                                                  | 0.000000                        |

### 1b-T

|   |           |           |           |
|---|-----------|-----------|-----------|
| V | 2.464004  | 0.142327  | -0.046339 |
| V | -2.487690 | -0.173698 | 0.101624  |
| V | -0.013107 | 0.952554  | -0.106495 |
| V | -0.178266 | -1.155482 | -0.004789 |
| C | 4.013374  | 0.111443  | -1.673131 |
| C | 3.075052  | -0.925614 | -1.948661 |
| C | 3.347726  | 1.383234  | -1.686221 |
| C | 1.813002  | -0.294864 | -2.164681 |
| C | 1.976430  | 1.146044  | -2.018074 |
| C | 3.870606  | 0.030718  | 1.667671  |
| C | 3.194388  | 1.297187  | 1.682327  |
| C | 2.923391  | -1.022121 | 1.844703  |
| C | 1.801901  | 1.038463  | 1.899759  |
| C | 1.638264  | -0.418342 | 2.001818  |
| H | 5.071143  | -0.038490 | -1.481836 |
| H | 3.296612  | -1.986992 | -1.991024 |
| H | 3.822754  | 2.342590  | -1.509939 |
| H | 4.940374  | -0.105606 | 1.546285  |
| H | 3.671419  | 2.266487  | 1.582154  |
| H | 3.155198  | -2.082198 | 1.863893  |
| C | -0.289175 | 0.758348  | -2.249766 |
| C | 0.677203  | 1.802054  | -2.057177 |
| C | 0.388316  | -0.551002 | -2.236939 |

**Electronic Supplementary Material (ESI) for New Journal of Chemistry**

This journal is © The Royal Society of Chemistry and The Centre National de la Recherche Scientifique 2013

|   |           |           |           |
|---|-----------|-----------|-----------|
| C | -0.443570 | 0.645616  | 2.170837  |
| C | 0.221349  | -0.675810 | 2.176137  |
| C | 0.503315  | 1.688280  | 1.991674  |
| H | 0.511919  | 2.871763  | -2.151180 |
| H | 0.327086  | 2.753686  | 2.110027  |
| C | -1.832018 | -1.001643 | -1.874649 |
| C | -1.678834 | 0.480644  | -1.940516 |
| C | -0.536298 | -1.635991 | -2.088787 |
| C | -2.052575 | -1.047292 | 2.108441  |
| C | -0.752835 | -1.719169 | 2.074726  |
| C | -1.871410 | 0.390090  | 2.174638  |
| H | -0.361229 | -2.677507 | -2.345509 |
| H | -0.585661 | -2.778313 | 2.257288  |
| C | -3.905053 | -0.015560 | -1.631160 |
| C | -2.976227 | 1.058233  | -1.763149 |
| C | -3.228554 | -1.278296 | -1.669392 |
| C | -4.075418 | -0.019999 | 1.719991  |
| C | -3.426178 | -1.294727 | 1.795843  |
| C | -3.125842 | 1.023144  | 1.920641  |
| H | -3.221138 | 2.114915  | -1.752769 |
| H | -3.334755 | 2.087133  | 1.898707  |
| H | -4.970921 | 0.108642  | -1.462621 |
| H | -5.131540 | 0.129423  | 1.516396  |
| H | -3.701905 | -2.253091 | -1.624579 |
| H | -3.911664 | -2.257047 | 1.673682  |

Intensities

=====

| Frequency<br>cm <sup>-1</sup> | Dipole Strength<br>1e-40 esu <sup>2</sup> cm <sup>2</sup> | Absorption Intensity<br>km/mole |
|-------------------------------|-----------------------------------------------------------|---------------------------------|
| -----                         | -----                                                     | -----                           |
| 43.732716                     | 71.937102                                                 | 0.788565                        |
| 55.062743                     | 15.579924                                                 | 0.215031                        |
| 66.340012                     | 32.841811                                                 | 0.546111                        |
| 111.875205                    | 92.591579                                                 | 2.596471                        |
| 123.340457                    | 19.756012                                                 | 0.610777                        |

**1c-S**

|   |           |           |          |
|---|-----------|-----------|----------|
| V | 2.824517  | -0.058185 | 0.000000 |
| V | -2.638001 | 0.171444  | 0.000000 |
| V | 0.707950  | 0.457057  | 0.000000 |

**Electronic Supplementary Material (ESI) for New Journal of Chemistry**

**This journal is © The Royal Society of Chemistry and The Centre National de la Recherche Scientifique 2013**

|   |           |           |           |
|---|-----------|-----------|-----------|
| V | -0.929133 | -1.246379 | 0.000000  |
| C | 4.003340  | -0.349661 | -1.902026 |
| C | 2.920499  | -1.281528 | -1.889764 |
| C | 3.494950  | 0.986941  | -1.832871 |
| C | 1.701048  | -0.520348 | -1.940655 |
| C | 2.052146  | 0.898946  | -1.904949 |
| C | 4.003340  | -0.349661 | 1.902026  |
| C | 3.494950  | 0.986941  | 1.832871  |
| C | 2.920499  | -1.281528 | 1.889764  |
| C | 2.052146  | 0.898946  | 1.904949  |
| C | 1.701048  | -0.520348 | 1.940655  |
| H | 5.056229  | -0.616092 | -1.917717 |
| H | 3.009785  | -2.362281 | -1.911470 |
| H | 4.090062  | 1.893780  | -1.834507 |
| H | 5.056229  | -0.616092 | 1.917717  |
| H | 4.090062  | 1.893780  | 1.834507  |
| H | 3.009785  | -2.362281 | 1.911470  |
| C | -0.236730 | 0.776330  | -2.018052 |
| C | 0.828263  | 1.704622  | -1.874393 |
| C | 0.247970  | -0.603430 | -1.963039 |
| C | -0.236730 | 0.776330  | 2.018052  |
| C | 0.247970  | -0.603430 | 1.963039  |
| C | 0.828263  | 1.704622  | 1.874393  |
| H | 0.767894  | 2.786160  | -1.897219 |
| H | 0.767894  | 2.786160  | 1.897219  |
| C | -2.068537 | -0.701523 | -2.003033 |
| C | -1.687063 | 0.707581  | -1.987850 |
| C | -0.870721 | -1.593479 | -2.009162 |
| C | -2.068537 | -0.701523 | 2.003033  |
| C | -0.870721 | -1.593479 | 2.009162  |
| C | -1.687063 | 0.707581  | 1.987850  |
| H | -0.821129 | -2.524159 | -2.570540 |
| H | -0.821129 | -2.524159 | 2.570540  |
| C | -3.965754 | 0.584659  | -1.788778 |
| C | -2.850712 | 1.498169  | -1.819268 |
| C | -3.500036 | -0.756942 | -1.882814 |
| C | -3.965754 | 0.584659  | 1.788778  |
| C | -3.500036 | -0.756942 | 1.882814  |
| C | -2.850712 | 1.498169  | 1.819268  |
| H | -2.911533 | 2.579652  | -1.770195 |
| H | -2.911533 | 2.579652  | 1.770195  |
| H | -5.006361 | 0.879587  | -1.688887 |
| H | -5.006361 | 0.879587  | 1.688887  |
| H | -4.119169 | -1.647233 | -1.892679 |



## Electronic Supplementary Material (ESI) for New Journal of Chemistry

This journal is © The Royal Society of Chemistry and The Centre National de la Recherche Scientifique 2013

H            -4.119169    -1.647233    1.892679

Intensities

=====

| Frequency<br>cm <sup>-1</sup> | Dipole Strength<br>1e-40 esu <sup>2</sup> cm <sup>2</sup> | Absorption Intensity<br>km/mole |
|-------------------------------|-----------------------------------------------------------|---------------------------------|
| -----                         | -----                                                     | -----                           |
| 76.883833                     | 2.926978                                                  | 0.056407                        |
| 94.273332                     | 15.221513                                                 | 0.359687                        |
| 113.234544                    | 51.386106                                                 | 1.458488                        |
| 145.686155                    | 10.393406                                                 | 0.379537                        |
| 154.684714                    | 67.984983                                                 | 2.635958                        |

**1c-T**

|   |           |           |           |
|---|-----------|-----------|-----------|
| V | 2.816094  | -0.159196 | 0.000000  |
| V | -2.610840 | 0.204677  | 0.000000  |
| V | 0.662209  | 0.460715  | 0.000000  |
| V | -0.893641 | -1.291492 | 0.000000  |
| C | 3.998321  | -0.322144 | -1.913459 |
| C | 2.918800  | -1.257268 | -1.960932 |
| C | 3.489037  | 1.009201  | -1.767189 |
| C | 1.699545  | -0.494580 | -1.955962 |
| C | 2.047500  | 0.926071  | -1.847099 |
| C | 3.998321  | -0.322144 | 1.913459  |
| C | 3.489037  | 1.009201  | 1.767189  |
| C | 2.918800  | -1.257268 | 1.960932  |
| C | 2.047500  | 0.926071  | 1.847099  |
| C | 1.699545  | -0.494580 | 1.955962  |
| H | 5.051866  | -0.585696 | -1.941612 |
| H | 3.010671  | -2.333999 | -2.054667 |
| H | 4.083718  | 1.914975  | -1.721745 |
| H | 5.051866  | -0.585696 | 1.941612  |
| H | 4.083718  | 1.914975  | 1.721745  |
| H | 3.010671  | -2.333999 | 2.054667  |
| C | -0.237993 | 0.799732  | -2.019154 |
| C | 0.821079  | 1.734550  | -1.815592 |
| C | 0.250246  | -0.573579 | -2.001667 |
| C | -0.237993 | 0.799732  | 2.019154  |
| C | 0.250246  | -0.573579 | 2.001667  |
| C | 0.821079  | 1.734550  | 1.815592  |
| H | 0.760364  | 2.815603  | -1.855521 |

## Electronic Supplementary Material (ESI) for New Journal of Chemistry

This journal is © The Royal Society of Chemistry and The Centre National de la Recherche Scientifique 2013

|   |           |           |           |
|---|-----------|-----------|-----------|
| H | 0.760364  | 2.815603  | 1.855521  |
| C | -2.059705 | -0.699846 | -1.996438 |
| C | -1.690698 | 0.718074  | -1.982513 |
| C | -0.853609 | -1.571311 | -2.035205 |
| C | -2.059705 | -0.699846 | 1.996438  |
| C | -0.853609 | -1.571311 | 2.035205  |
| C | -1.690698 | 0.718074  | 1.982513  |
| H | -0.803728 | -2.504523 | -2.593044 |
| H | -0.803728 | -2.504523 | 2.593044  |
| C | -3.972018 | 0.573215  | -1.784081 |
| C | -2.868681 | 1.494844  | -1.834218 |
| C | -3.489318 | -0.762334 | -1.869475 |
| C | -3.972018 | 0.573215  | 1.784081  |
| C | -3.489318 | -0.762334 | 1.869475  |
| C | -2.868681 | 1.494844  | 1.834218  |
| H | -2.943426 | 2.575965  | -1.786222 |
| H | -2.943426 | 2.575965  | 1.786222  |
| H | -5.015641 | 0.856431  | -1.685217 |
| H | -5.015641 | 0.856431  | 1.685217  |
| H | -4.100202 | -1.659104 | -1.847358 |
| H | -4.100202 | -1.659104 | 1.847358  |

### Intensities

=====

| Frequency<br>cm <sup>-1</sup> | Dipole Strength<br>1e-40 esu <sup>2</sup> cm <sup>2</sup> | Absorption Intensity<br>km/mole |
|-------------------------------|-----------------------------------------------------------|---------------------------------|
| -----                         | -----                                                     | -----                           |
| 76.348144                     | 1.049257                                                  | 0.020080                        |
| 129.078160                    | 44.327327                                                 | 1.434176                        |
| 131.785188                    | 90.976426                                                 | 3.005201                        |
| 138.935417                    | 70.868454                                                 | 2.467993                        |
| 143.284711                    | 74.506800                                                 | 2.675924                        |

### 2a-cis-S

|    |           |           |          |
|----|-----------|-----------|----------|
| V  | 3.059344  | 0.011022  | 0.000000 |
| V  | -3.111179 | 0.095241  | 0.000000 |
| V  | 0.874282  | 0.730803  | 0.000000 |
| V  | -0.933714 | -0.559142 | 0.000000 |
| Cl | 4.823080  | -1.716329 | 0.000000 |
| Cl | -3.433295 | 2.472954  | 0.000000 |

## Electronic Supplementary Material (ESI) for New Journal of Chemistry

This journal is © The Royal Society of Chemistry and The Centre National de la Recherche Scientifique 2013

|   |           |           |           |
|---|-----------|-----------|-----------|
| C | 3.878856  | 0.274214  | -2.110573 |
| C | 2.981902  | -0.852410 | -2.079048 |
| C | 3.149481  | 1.473882  | -1.945154 |
| C | 1.665392  | -0.334304 | -1.963041 |
| C | 1.745218  | 1.129466  | -1.994034 |
| C | 3.878856  | 0.274214  | 2.110573  |
| C | 3.149481  | 1.473882  | 1.945154  |
| C | 2.981902  | -0.852410 | 2.079048  |
| C | 1.745218  | 1.129466  | 1.994034  |
| C | 1.665392  | -0.334304 | 1.963041  |
| H | 4.958028  | 0.197030  | -2.182645 |
| H | 3.270326  | -1.890682 | -2.166615 |
| H | 3.565541  | 2.475790  | -1.937713 |
| H | 4.958028  | 0.197030  | 2.182645  |
| H | 3.565541  | 2.475790  | 1.937713  |
| H | 3.270326  | -1.890682 | 2.166615  |
| C | -0.489266 | 0.560120  | -1.972148 |
| C | 0.420718  | 1.699331  | -1.912158 |
| C | 0.252276  | -0.697215 | -1.906059 |
| C | -0.489266 | 0.560120  | 1.972148  |
| C | 0.252276  | -0.697215 | 1.906059  |
| C | 0.420718  | 1.699331  | 1.912158  |
| H | 0.140389  | 2.741432  | -2.010418 |
| H | 0.140389  | 2.741432  | 2.010418  |
| C | -1.987129 | -1.260187 | -1.822188 |
| C | -1.896988 | 0.193593  | -1.986324 |
| C | -0.656172 | -1.824424 | -1.707271 |
| C | -1.987129 | -1.260187 | 1.822188  |
| C | -0.656172 | -1.824424 | 1.707271  |
| C | -1.896988 | 0.193593  | 1.986324  |
| H | -0.391418 | -2.874772 | -1.701450 |
| H | -0.391418 | -2.874772 | 1.701450  |
| C | -4.132151 | -0.412796 | -2.010933 |
| C | -3.243515 | 0.685471  | -2.153790 |
| C | -3.392920 | -1.578506 | -1.674780 |
| C | -4.132151 | -0.412796 | 2.010933  |
| C | -3.392920 | -1.578506 | 1.674780  |
| C | -3.243515 | 0.685471  | 2.153790  |
| H | -3.523309 | 1.699124  | -2.398292 |
| H | -3.523309 | 1.699124  | 2.398292  |
| H | -5.213362 | -0.356054 | -2.092975 |
| H | -5.213362 | -0.356054 | 2.092975  |
| H | -3.812143 | -2.564867 | -1.506339 |
| H | -3.812143 | -2.564867 | 1.506339  |

## Electronic Supplementary Material (ESI) for New Journal of Chemistry

This journal is © The Royal Society of Chemistry and The Centre National de la Recherche Scientifique 2013

### Intensities

=====

| Frequency<br>cm <sup>-1</sup> | Dipole Strength<br>1e-40 esu <sup>2</sup> cm <sup>2</sup> | Absorption Intensity<br>km/mole |
|-------------------------------|-----------------------------------------------------------|---------------------------------|
| -----                         | -----                                                     | -----                           |
| 19.212994                     | 0.000000                                                  | 0.000000                        |
| 35.209908                     | 1343.992505                                               | 11.861505                       |
| 41.713599                     | 165.376361                                                | 1.729136                        |
| 86.245083                     | 42.413531                                                 | 0.916889                        |
| 112.346801                    | 28.502329                                                 | 0.802637                        |

### 2a-cis-T

|    |           |           |           |
|----|-----------|-----------|-----------|
| V  | 3.234741  | -0.197078 | 0.000000  |
| V  | -3.234741 | 0.197078  | 0.000000  |
| V  | 0.930094  | 0.568668  | 0.000000  |
| V  | -0.930094 | -0.568668 | 0.000000  |
| Cl | 4.965251  | -1.846049 | 0.000000  |
| Cl | -4.965251 | 1.846049  | 0.000000  |
| C  | 4.005619  | 0.130876  | -2.151610 |
| C  | 3.059399  | -0.948398 | -2.105404 |
| C  | 3.352782  | 1.357071  | -1.912720 |
| C  | 1.767482  | -0.362083 | -1.932156 |
| C  | 1.926630  | 1.096848  | -1.912914 |
| C  | 4.005619  | 0.130876  | 2.151610  |
| C  | 3.352782  | 1.357071  | 1.912720  |
| C  | 3.059399  | -0.948398 | 2.105404  |
| C  | 1.926630  | 1.096848  | 1.912914  |
| C  | 1.767482  | -0.362083 | 1.932156  |
| H  | 5.076457  | 0.004427  | -2.268849 |
| H  | 3.286027  | -1.996176 | -2.252305 |
| H  | 3.828707  | 2.331780  | -1.879093 |
| H  | 5.076457  | 0.004427  | 2.268849  |
| H  | 3.828707  | 2.331780  | 1.879093  |
| H  | 3.286027  | -1.996176 | 2.252305  |
| C  | -0.337142 | 0.650087  | -1.882757 |
| C  | 0.638333  | 1.738298  | -1.790076 |
| C  | 0.337142  | -0.650087 | -1.882757 |
| C  | -0.337142 | 0.650087  | 1.882757  |
| C  | 0.337142  | -0.650087 | 1.882757  |
| C  | 0.638333  | 1.738298  | 1.790076  |



## Electronic Supplementary Material (ESI) for New Journal of Chemistry

This journal is © The Royal Society of Chemistry and The Centre National de la Recherche Scientifique 2013

|   |           |           |           |
|---|-----------|-----------|-----------|
| H | 0.422834  | 2.797885  | -1.857659 |
| H | 0.422834  | 2.797885  | 1.857659  |
| C | -1.926630 | -1.096848 | -1.912914 |
| C | -1.767482 | 0.362083  | -1.932156 |
| C | -0.638333 | -1.738298 | -1.790076 |
| C | -1.926630 | -1.096848 | 1.912914  |
| C | -0.638333 | -1.738298 | 1.790076  |
| C | -1.767482 | 0.362083  | 1.932156  |
| H | -0.422834 | -2.797885 | -1.857659 |
| H | -0.422834 | -2.797885 | 1.857659  |
| C | -4.005619 | -0.130876 | -2.151610 |
| C | -3.059399 | 0.948398  | -2.105404 |
| C | -3.352782 | -1.357071 | -1.912720 |
| C | -4.005619 | -0.130876 | 2.151610  |
| C | -3.352782 | -1.357071 | 1.912720  |
| C | -3.059399 | 0.948398  | 2.105404  |
| H | -3.286027 | 1.996176  | -2.252305 |
| H | -3.286027 | 1.996176  | 2.252305  |
| H | -5.076457 | -0.004427 | -2.268849 |
| H | -5.076457 | -0.004427 | 2.268849  |
| H | -3.828707 | -2.331780 | -1.879093 |
| H | -3.828707 | -2.331780 | 1.879093  |

### Intensities

=====

| Frequency<br>cm <sup>-1</sup> | Dipole Strength<br>1e-40 esu <sup>2</sup> cm <sup>2</sup> | Absorption Intensity<br>km/mole |
|-------------------------------|-----------------------------------------------------------|---------------------------------|
| -----                         | -----                                                     | -----                           |
| 27.265517                     | 274.191118                                                | 1.873895                        |
| 44.180892                     | 0.000000                                                  | 0.000000                        |
| 51.977570                     | 162.720710                                                | 2.120005                        |
| 54.603634                     | 785.816163                                                | 10.755252                       |
| 105.528169                    | 49.240899                                                 | 1.302484                        |

### 2a-trans-S

|    |           |           |          |
|----|-----------|-----------|----------|
| V  | 0.539787  | -1.049216 | 0.000000 |
| V  | -0.539787 | 1.049216  | 0.000000 |
| V  | -0.090993 | -3.187607 | 0.000000 |
| V  | 0.090993  | 3.187607  | 0.000000 |
| Cl | -1.929847 | 4.527209  | 0.000000 |
| Cl | 1.929847  | -4.527209 | 0.000000 |

**Electronic Supplementary Material (ESI) for New Journal of Chemistry**

**This journal is © The Royal Society of Chemistry and The Centre National de la Recherche Scientifique 2013**

|   |           |           |           |
|---|-----------|-----------|-----------|
| C | -0.817827 | -3.938101 | -2.070938 |
| C | -1.610974 | -2.808304 | -1.702182 |
| C | 0.534411  | -3.544682 | -2.194863 |
| C | -0.747762 | -1.652946 | -1.791412 |
| C | 0.624321  | -2.113218 | -2.001443 |
| C | -0.817827 | -3.938101 | 2.070938  |
| C | 0.534411  | -3.544682 | 2.194863  |
| C | -1.610974 | -2.808304 | 1.702182  |
| C | 0.624321  | -2.113218 | 2.001443  |
| C | -0.747762 | -1.652946 | 1.791412  |
| H | -1.182392 | -4.955168 | -2.179337 |
| H | -2.688487 | -2.798794 | -1.581854 |
| H | 1.358978  | -4.201018 | -2.431162 |
| H | -1.182392 | -4.955168 | 2.179337  |
| H | 1.358978  | -4.201018 | 2.431162  |
| H | -2.688487 | -2.798794 | 1.581854  |
| C | 0.715549  | 0.193791  | -1.827315 |
| C | 1.559160  | -0.989924 | -1.884255 |
| C | -0.715549 | -0.193791 | -1.827315 |
| C | 0.715549  | 0.193791  | 1.827315  |
| C | -0.715549 | -0.193791 | 1.827315  |
| C | 1.559160  | -0.989924 | 1.884255  |
| H | 2.626615  | -1.017408 | -2.068385 |
| H | 2.626615  | -1.017408 | 2.068385  |
| C | -0.624321 | 2.113218  | -2.001443 |
| C | 0.747762  | 1.652946  | -1.791412 |
| C | -1.559160 | 0.989924  | -1.884255 |
| C | -0.624321 | 2.113218  | 2.001443  |
| C | -1.559160 | 0.989924  | 1.884255  |
| C | 0.747762  | 1.652946  | 1.791412  |
| H | -2.626615 | 1.017408  | -2.068385 |
| H | -2.626615 | 1.017408  | 2.068385  |
| C | 0.817827  | 3.938101  | -2.070938 |
| C | 1.610974  | 2.808304  | -1.702182 |
| C | -0.534411 | 3.544682  | -2.194863 |
| C | 0.817827  | 3.938101  | 2.070938  |
| C | -0.534411 | 3.544682  | 2.194863  |
| C | 1.610974  | 2.808304  | 1.702182  |
| H | 2.688487  | 2.798794  | -1.581854 |
| H | 2.688487  | 2.798794  | 1.581854  |
| H | 1.182392  | 4.955168  | -2.179337 |
| H | 1.182392  | 4.955168  | 2.179337  |
| H | -1.358978 | 4.201018  | -2.431162 |
| H | -1.358978 | 4.201018  | 2.431162  |

## Electronic Supplementary Material (ESI) for New Journal of Chemistry

This journal is © The Royal Society of Chemistry and The Centre National de la Recherche Scientifique 2013

### Intensities

=====

| Frequency<br>cm <sup>-1</sup> | Dipole Strength<br>1e-40 esu <sup>2</sup> cm <sup>2</sup> | Absorption Intensity<br>km/mole |
|-------------------------------|-----------------------------------------------------------|---------------------------------|
| -----                         | -----                                                     | -----                           |
| 33.478626                     | 0.000000                                                  | 0.000000                        |
| 35.346223                     | 183.591412                                                | 1.626573                        |
| 58.235555                     | 93.199667                                                 | 1.360444                        |
| 66.598116                     | 476.173126                                                | 7.948861                        |
| 124.491086                    | 1.414816                                                  | 0.044149                        |

### 2a-trans-T

|    |           |           |           |
|----|-----------|-----------|-----------|
| V  | 0.624385  | -1.069854 | 0.000000  |
| V  | -0.624385 | 1.069854  | 0.000000  |
| V  | -0.036623 | -3.197311 | 0.000000  |
| V  | 0.036623  | 3.197311  | 0.000000  |
| Cl | -1.788553 | 4.786710  | 0.000000  |
| Cl | 1.788553  | -4.786710 | 0.000000  |
| C  | -0.740756 | -3.940639 | -2.084898 |
| C  | -1.557600 | -2.831736 | -1.719018 |
| C  | 0.607536  | -3.523678 | -2.210382 |
| C  | -0.712157 | -1.662639 | -1.789932 |
| C  | 0.671001  | -2.099185 | -2.014374 |
| C  | -0.740756 | -3.940639 | 2.084898  |
| C  | 0.607536  | -3.523678 | 2.210382  |
| C  | -1.557600 | -2.831736 | 1.719018  |
| C  | 0.671001  | -2.099185 | 2.014374  |
| C  | -0.712157 | -1.662639 | 1.789932  |
| H  | -1.081387 | -4.968035 | -2.174696 |
| H  | -2.635528 | -2.843625 | -1.603171 |
| H  | 1.443978  | -4.171336 | -2.429436 |
| H  | -1.081387 | -4.968035 | 2.174696  |
| H  | 1.443978  | -4.171336 | 2.429436  |
| H  | -2.635528 | -2.843625 | 1.603171  |
| C  | 0.707246  | 0.207296  | -1.857488 |
| C  | 1.572416  | -0.951104 | -1.926973 |
| C  | -0.707246 | -0.207296 | -1.857488 |
| C  | 0.707246  | 0.207296  | 1.857488  |
| C  | -0.707246 | -0.207296 | 1.857488  |
| C  | 1.572416  | -0.951104 | 1.926973  |

## Electronic Supplementary Material (ESI) for New Journal of Chemistry

This journal is © The Royal Society of Chemistry and The Centre National de la Recherche Scientifique 2013

|   |           |           |           |
|---|-----------|-----------|-----------|
| H | 2.643068  | -0.949967 | -2.094416 |
| H | 2.643068  | -0.949967 | 2.094416  |
| C | -0.671001 | 2.099185  | -2.014374 |
| C | 0.712157  | 1.662639  | -1.789932 |
| C | -1.572416 | 0.951104  | -1.926973 |
| C | -0.671001 | 2.099185  | 2.014374  |
| C | -1.572416 | 0.951104  | 1.926973  |
| C | 0.712157  | 1.662639  | 1.789932  |
| H | -2.643068 | 0.949967  | -2.094416 |
| H | -2.643068 | 0.949967  | 2.094416  |
| C | 0.740756  | 3.940639  | -2.084898 |
| C | 1.557600  | 2.831736  | -1.719018 |
| C | -0.607536 | 3.523678  | -2.210382 |
| C | 0.740756  | 3.940639  | 2.084898  |
| C | -0.607536 | 3.523678  | 2.210382  |
| C | 1.557600  | 2.831736  | 1.719018  |
| H | 2.635528  | 2.843625  | -1.603171 |
| H | 2.635528  | 2.843625  | 1.603171  |
| H | 1.081387  | 4.968035  | -2.174696 |
| H | 1.081387  | 4.968035  | 2.174696  |
| H | -1.443978 | 4.171336  | -2.429436 |
| H | -1.443978 | 4.171336  | 2.429436  |

### Intensities

=====

| Frequency<br>cm <sup>-1</sup> | Dipole Strength<br>1e-40 esu <sup>2</sup> cm <sup>2</sup> | Absorption Intensity<br>km/mole |
|-------------------------------|-----------------------------------------------------------|---------------------------------|
| -----                         | -----                                                     | -----                           |
| 27.805820                     | 536.107833                                                | 3.736508                        |
| 32.163612                     | 0.000000                                                  | 0.000000                        |
| 51.660252                     | 83.595625                                                 | 1.082476                        |
| 70.706082                     | 449.311134                                                | 7.963097                        |
| 98.821833                     | 0.000000                                                  | 0.000000                        |

### 2b-S

|    |           |           |           |
|----|-----------|-----------|-----------|
| V  | 2.457403  | -0.023302 | -0.047453 |
| V  | -2.457403 | 0.023302  | 0.047453  |
| V  | 0.310876  | 1.087807  | 0.204506  |
| V  | -0.310876 | -1.087807 | -0.204506 |
| Cl | 1.520855  | -2.674167 | -0.017890 |
| Cl | -1.520855 | 2.674167  | 0.017890  |



**Electronic Supplementary Material (ESI) for New Journal of Chemistry**

**This journal is © The Royal Society of Chemistry and The Centre National de la Recherche Scientifique 2013**

|   |           |           |           |
|---|-----------|-----------|-----------|
| C | 4.003212  | 0.122418  | -1.693833 |
| C | 3.115737  | -0.933648 | -2.020834 |
| C | 3.275498  | 1.354672  | -1.601788 |
| C | 1.810005  | -0.358475 | -2.173589 |
| C | 1.912815  | 1.076549  | -1.951101 |
| C | 3.926116  | 0.178539  | 1.649504  |
| C | 3.212236  | 1.414213  | 1.596723  |
| C | 3.025819  | -0.892292 | 1.948878  |
| C | 1.847404  | 1.136385  | 1.957366  |
| C | 1.729285  | -0.316685 | 2.089123  |
| H | 5.068101  | 0.008027  | -1.516810 |
| H | 3.380168  | -1.980162 | -2.106975 |
| H | 3.704296  | 2.325073  | -1.376286 |
| H | 4.992793  | 0.065701  | 1.483055  |
| H | 3.648756  | 2.391730  | 1.423151  |
| H | 3.282034  | -1.941428 | 2.021260  |
| C | -0.311576 | 0.606426  | -2.159350 |
| C | 0.601098  | 1.689623  | -1.951938 |
| C | 0.392681  | -0.672533 | -2.288163 |
| C | -0.392681 | 0.672533  | 2.288163  |
| C | 0.311576  | -0.606426 | 2.159350  |
| C | 0.553500  | 1.761333  | 2.179821  |
| H | 0.373682  | 2.744505  | -2.050530 |
| H | 0.370933  | 2.817541  | 2.338454  |
| C | -1.847404 | -1.136385 | -1.957366 |
| C | -1.729285 | 0.316685  | -2.089123 |
| C | -0.553500 | -1.761333 | -2.179821 |
| C | -1.912815 | -1.076549 | 1.951101  |
| C | -0.601098 | -1.689623 | 1.951938  |
| C | -1.810005 | 0.358475  | 2.173589  |
| H | -0.370933 | -2.817541 | -2.338454 |
| H | -0.373682 | -2.744505 | 2.050530  |
| C | -3.926116 | -0.178539 | -1.649504 |
| C | -3.025819 | 0.892292  | -1.948878 |
| C | -3.212236 | -1.414213 | -1.596723 |
| C | -4.003212 | -0.122418 | 1.693833  |
| C | -3.275498 | -1.354672 | 1.601788  |
| C | -3.115737 | 0.933648  | 2.020834  |
| H | -3.282034 | 1.941428  | -2.021260 |
| H | -3.380168 | 1.980162  | 2.106975  |
| H | -4.992793 | -0.065701 | -1.483055 |
| H | -5.068101 | -0.008027 | 1.516810  |
| H | -3.648756 | -2.391730 | -1.423151 |
| H | -3.704296 | -2.325073 | 1.376286  |

## Electronic Supplementary Material (ESI) for New Journal of Chemistry

This journal is © The Royal Society of Chemistry and The Centre National de la Recherche Scientifique 2013

### Intensities

=====

| Frequency<br>cm <sup>-1</sup> | Dipole Strength<br>1e-40 esu <sup>2</sup> cm <sup>2</sup> | Absorption Intensity<br>km/mole |
|-------------------------------|-----------------------------------------------------------|---------------------------------|
| -----                         | -----                                                     | -----                           |
| -15.253111                    | 0.000000                                                  | 0.000000                        |
| 69.078107                     | 0.000000                                                  | 0.000000                        |
| 92.952194                     | 79.759681                                                 | 1.858323                        |
| 127.111819                    | 123.824676                                                | 3.945220                        |
| 130.890949                    | 0.000000                                                  | 0.000000                        |

### 2b-T

|    |           |           |           |
|----|-----------|-----------|-----------|
| V  | 2.476989  | 0.265955  | -0.109703 |
| V  | -2.476989 | -0.265955 | 0.109703  |
| V  | 0.164883  | 1.126336  | 0.225900  |
| V  | -0.164883 | -1.126336 | -0.225900 |
| Cl | 1.184081  | -3.061802 | 0.003274  |
| Cl | -1.184081 | 3.061802  | -0.003274 |
| C  | 4.056048  | 0.151284  | -1.738881 |
| C  | 3.154745  | -0.926849 | -1.960008 |
| C  | 3.354754  | 1.398344  | -1.799454 |
| C  | 1.868949  | -0.357968 | -2.212640 |
| C  | 1.989802  | 1.092944  | -2.094559 |
| C  | 3.867422  | 0.214846  | 1.681030  |
| C  | 3.171358  | 1.454211  | 1.715559  |
| C  | 2.950271  | -0.876978 | 1.763983  |
| C  | 1.776166  | 1.153078  | 1.940068  |
| C  | 1.649792  | -0.313091 | 1.926947  |
| H  | 5.116108  | 0.040953  | -1.530458 |
| H  | 3.398497  | -1.982098 | -1.915255 |
| H  | 3.791953  | 2.381896  | -1.663018 |
| H  | 4.940578  | 0.111192  | 1.547658  |
| H  | 3.622159  | 2.439891  | 1.673297  |
| H  | 3.189471  | -1.932248 | 1.710627  |
| C  | -0.244828 | 0.618418  | -2.093872 |
| C  | 0.676640  | 1.692182  | -1.983223 |
| C  | 0.453351  | -0.671025 | -2.296490 |
| C  | -0.453351 | 0.671025  | 2.296490  |
| C  | 0.244828  | -0.618418 | 2.093872  |
| C  | 0.484179  | 1.752538  | 2.248122  |

## Electronic Supplementary Material (ESI) for New Journal of Chemistry

This journal is © The Royal Society of Chemistry and The Centre National de la Recherche Scientifique 2013

|   |           |           |           |
|---|-----------|-----------|-----------|
| H | 0.435693  | 2.746498  | -2.033223 |
| H | 0.294954  | 2.801044  | 2.439814  |
| C | -1.776166 | -1.153078 | -1.940068 |
| C | -1.649792 | 0.313091  | -1.926947 |
| C | -0.484179 | -1.752538 | -2.248122 |
| C | -1.989802 | -1.092944 | 2.094559  |
| C | -0.676640 | -1.692182 | 1.983223  |
| C | -1.868949 | 0.357968  | 2.212640  |
| H | -0.294954 | -2.801044 | -2.439814 |
| H | -0.435693 | -2.746498 | 2.033223  |
| C | -3.867422 | -0.214846 | -1.681030 |
| C | -2.950271 | 0.876978  | -1.763983 |
| C | -3.171358 | -1.454211 | -1.715559 |
| C | -4.056048 | -0.151284 | 1.738881  |
| C | -3.354754 | -1.398344 | 1.799454  |
| C | -3.154745 | 0.926849  | 1.960008  |
| H | -3.189471 | 1.932248  | -1.710627 |
| H | -3.398497 | 1.982098  | 1.915255  |
| H | -4.940578 | -0.111192 | -1.547658 |
| H | -5.116108 | -0.040953 | 1.530458  |
| H | -3.622159 | -2.439891 | -1.673297 |
| H | -3.791953 | -2.381896 | 1.663018  |

### Intensities

=====

| Frequency<br>cm <sup>-1</sup> | Dipole Strength<br>1e-40 esu <sup>2</sup> cm <sup>2</sup> | Absorption Intensity<br>km/mole |
|-------------------------------|-----------------------------------------------------------|---------------------------------|
| -----                         | -----                                                     | -----                           |
| 72.390058                     | 34.415782                                                 | 0.624474                        |
| 88.083107                     | 0.000000                                                  | 0.000000                        |
| 95.709835                     | 302.524924                                                | 7.257646                        |
| 116.112254                    | 0.000000                                                  | 0.000000                        |
| 120.093129                    | 49.718352                                                 | 1.496625                        |

### 3a-cis-S

|   |           |           |          |
|---|-----------|-----------|----------|
| V | 0.599359  | -0.881997 | 0.000000 |
| V | -0.599359 | 0.881997  | 0.000000 |
| V | 0.010913  | -3.166092 | 0.000000 |
| V | -0.010913 | 3.166092  | 0.000000 |
| C | -1.616341 | -4.172067 | 0.000000 |
| C | 1.616341  | 4.172067  | 0.000000 |

## Electronic Supplementary Material (ESI) for New Journal of Chemistry

This journal is © The Royal Society of Chemistry and The Centre National de la Recherche Scientifique 2013

|   |           |           |           |
|---|-----------|-----------|-----------|
| O | -2.619856 | -4.778277 | 0.000000  |
| O | 2.619856  | 4.778277  | 0.000000  |
| C | 0.273586  | -4.028183 | -2.069186 |
| C | -0.832955 | -3.104708 | -2.078636 |
| C | 1.478239  | -3.323188 | -1.797796 |
| C | -0.295168 | -1.784001 | -1.917584 |
| C | 1.165241  | -1.898638 | -1.883074 |
| C | 0.273586  | -4.028183 | 2.069186  |
| C | 1.478239  | -3.323188 | 1.797796  |
| C | -0.832955 | -3.104708 | 2.078636  |
| C | 1.165241  | -1.898638 | 1.883074  |
| C | -0.295168 | -1.784001 | 1.917584  |
| H | 0.189419  | -5.100308 | -2.213819 |
| H | -1.860290 | -3.341518 | -2.326051 |
| H | 2.471090  | -3.758754 | -1.774938 |
| H | 0.189419  | -5.100308 | 2.213819  |
| H | 2.471090  | -3.758754 | 1.774938  |
| H | -1.860290 | -3.341518 | 2.326051  |
| C | 0.638208  | 0.361151  | -1.895329 |
| C | 1.759078  | -0.578888 | -1.782934 |
| C | -0.638208 | -0.361151 | -1.895329 |
| C | 0.638208  | 0.361151  | 1.895329  |
| C | -0.638208 | -0.361151 | 1.895329  |
| C | 1.759078  | -0.578888 | 1.782934  |
| H | 2.811112  | -0.329715 | -1.850464 |
| H | 2.811112  | -0.329715 | 1.850464  |
| C | -1.165241 | 1.898638  | -1.883074 |
| C | 0.295168  | 1.784001  | -1.917584 |
| C | -1.759078 | 0.578888  | -1.782934 |
| C | -1.165241 | 1.898638  | 1.883074  |
| C | -1.759078 | 0.578888  | 1.782934  |
| C | 0.295168  | 1.784001  | 1.917584  |
| H | -2.811112 | 0.329715  | -1.850464 |
| H | -2.811112 | 0.329715  | 1.850464  |
| C | -0.273586 | 4.028183  | -2.069186 |
| C | 0.832955  | 3.104708  | -2.078636 |
| C | -1.478239 | 3.323188  | -1.797796 |
| C | -0.273586 | 4.028183  | 2.069186  |
| C | -1.478239 | 3.323188  | 1.797796  |
| C | 0.832955  | 3.104708  | 2.078636  |
| H | 1.860290  | 3.341518  | -2.326051 |
| H | 1.860290  | 3.341518  | 2.326051  |
| H | -0.189419 | 5.100308  | -2.213819 |
| H | -0.189419 | 5.100308  | 2.213819  |

## Electronic Supplementary Material (ESI) for New Journal of Chemistry

This journal is © The Royal Society of Chemistry and The Centre National de la Recherche Scientifique 2013

|   |           |          |           |
|---|-----------|----------|-----------|
| H | -2.471090 | 3.758754 | -1.774938 |
| H | -2.471090 | 3.758754 | 1.774938  |

### Intensities

| Frequency<br>cm <sup>-1</sup> | Dipole Strength<br>1e-40 esu <sup>2</sup> cm <sup>2</sup> | Absorption Intensity<br>km/mole |
|-------------------------------|-----------------------------------------------------------|---------------------------------|
| 48.141842                     | 321.928562                                                | 3.884725                        |
| 50.154828                     | 0.000000                                                  | 0.000000                        |
| 63.249497                     | 0.141565                                                  | 0.002244                        |
| 85.131541                     | 100.652875                                                | 2.147804                        |
| 111.749740                    | 0.049159                                                  | 0.001377                        |

### 3a-cis-T

|   |           |           |           |
|---|-----------|-----------|-----------|
| V | 0.609051  | -0.865503 | 0.000000  |
| V | -0.609051 | 0.865503  | 0.000000  |
| V | -0.074920 | -3.275740 | 0.000000  |
| V | 0.074920  | 3.275740  | 0.000000  |
| C | -1.543609 | -4.506096 | 0.000000  |
| C | 1.543609  | 4.506096  | 0.000000  |
| O | -2.440477 | -5.256278 | 0.000000  |
| O | 2.440477  | 5.256278  | 0.000000  |
| C | 0.180499  | -4.020696 | -2.108244 |
| C | -0.909855 | -3.076803 | -2.091851 |
| C | 1.401207  | -3.342853 | -1.840953 |
| C | -0.335831 | -1.775956 | -1.918697 |
| C | 1.122970  | -1.914875 | -1.898608 |
| C | 0.180499  | -4.020696 | 2.108244  |
| C | 1.401207  | -3.342853 | 1.840953  |
| C | -0.909855 | -3.076803 | 2.091851  |
| C | 1.122970  | -1.914875 | 1.898608  |
| C | -0.335831 | -1.775956 | 1.918697  |
| H | 0.081562  | -5.084764 | -2.297292 |
| H | -1.945625 | -3.294795 | -2.322685 |
| H | 2.383576  | -3.803211 | -1.828535 |
| H | 0.081562  | -5.084764 | 2.297292  |
| H | 2.383576  | -3.803211 | 1.828535  |
| H | -1.945625 | -3.294795 | 2.322685  |
| C | 0.646688  | 0.350667  | -1.893892 |
| C | 1.746069  | -0.616039 | -1.813013 |

## Electronic Supplementary Material (ESI) for New Journal of Chemistry

This journal is © The Royal Society of Chemistry and The Centre National de la Recherche Scientifique 2013

|   |           |           |           |
|---|-----------|-----------|-----------|
| C | -0.646688 | -0.350667 | -1.893892 |
| C | 0.646688  | 0.350667  | 1.893892  |
| C | -0.646688 | -0.350667 | 1.893892  |
| C | 1.746069  | -0.616039 | 1.813013  |
| H | 2.803630  | -0.391106 | -1.881534 |
| H | 2.803630  | -0.391106 | 1.881534  |
| C | -1.122970 | 1.914875  | -1.898608 |
| C | 0.335831  | 1.775956  | -1.918697 |
| C | -1.746069 | 0.616039  | -1.813013 |
| C | -1.122970 | 1.914875  | 1.898608  |
| C | -1.746069 | 0.616039  | 1.813013  |
| C | 0.335831  | 1.775956  | 1.918697  |
| H | -2.803630 | 0.391106  | -1.881534 |
| H | -2.803630 | 0.391106  | 1.881534  |
| C | -0.180499 | 4.020696  | -2.108244 |
| C | 0.909855  | 3.076803  | -2.091851 |
| C | -1.401207 | 3.342853  | -1.840953 |
| C | -0.180499 | 4.020696  | 2.108244  |
| C | -1.401207 | 3.342853  | 1.840953  |
| C | 0.909855  | 3.076803  | 2.091851  |
| H | 1.945625  | 3.294795  | -2.322685 |
| H | 1.945625  | 3.294795  | 2.322685  |
| H | -0.081562 | 5.084764  | -2.297292 |
| H | -0.081562 | 5.084764  | 2.297292  |
| H | -2.383576 | 3.803211  | -1.828535 |
| H | -2.383576 | 3.803211  | 1.828535  |

### Intensities

=====

| Frequency<br>cm <sup>-1</sup> | Dipole Strength<br>1e-40 esu <sup>2</sup> cm <sup>2</sup> | Absorption Intensity<br>km/mole |
|-------------------------------|-----------------------------------------------------------|---------------------------------|
| -----                         | -----                                                     | -----                           |
| 29.944129                     | 316.308479                                                | 2.374109                        |
| 52.565812                     | 153.996601                                                | 2.029049                        |
| 56.948304                     | 233.046335                                                | 3.326604                        |
| 56.990807                     | 0.000000                                                  | 0.000000                        |
| 71.611755                     | 8.890615                                                  | 0.159586                        |

### 3a-trans-S

|   |           |           |          |
|---|-----------|-----------|----------|
| V | 0.442370  | -1.028245 | 0.000000 |
| V | -0.442370 | 1.028245  | 0.000000 |

**Electronic Supplementary Material (ESI) for New Journal of Chemistry**

**This journal is © The Royal Society of Chemistry and The Centre National de la Recherche Scientifique 2013**

|   |           |           |           |
|---|-----------|-----------|-----------|
| V | -0.256875 | -3.252868 | 0.000000  |
| V | 0.256875  | 3.252868  | 0.000000  |
| C | 0.711401  | -4.924856 | 0.000000  |
| C | -0.711401 | 4.924856  | 0.000000  |
| O | 1.310498  | -5.928916 | 0.000000  |
| O | -1.310498 | 5.928916  | 0.000000  |
| C | -0.887714 | -3.932779 | -2.060306 |
| C | -1.671933 | -2.788019 | -1.761615 |
| C | 0.507275  | -3.565168 | -2.092192 |
| C | -0.773448 | -1.643368 | -1.806777 |
| C | 0.600003  | -2.131180 | -1.955214 |
| C | -0.887714 | -3.932779 | 2.060306  |
| C | 0.507275  | -3.565168 | 2.092192  |
| C | -1.671933 | -2.788019 | 1.761615  |
| C | 0.600003  | -2.131180 | 1.955214  |
| C | -0.773448 | -1.643368 | 1.806777  |
| H | -1.270587 | -4.936950 | -2.208168 |
| H | -2.754207 | -2.752330 | -1.713826 |
| H | 1.328009  | -4.226917 | -2.342652 |
| H | -1.270587 | -4.936950 | 2.208168  |
| H | 1.328009  | -4.226917 | 2.342652  |
| H | -2.754207 | -2.752330 | 1.713826  |
| C | 0.715900  | 0.185214  | -1.852259 |
| C | 1.537342  | -1.018570 | -1.843172 |
| C | -0.715900 | -0.185214 | -1.852259 |
| C | 0.715900  | 0.185214  | 1.852259  |
| C | -0.715900 | -0.185214 | 1.852259  |
| C | 1.537342  | -1.018570 | 1.843172  |
| H | 2.612621  | -1.060812 | -1.968100 |
| H | 2.612621  | -1.060812 | 1.968100  |
| C | -0.600003 | 2.131180  | -1.955214 |
| C | 0.773448  | 1.643368  | -1.806777 |
| C | -1.537342 | 1.018570  | -1.843172 |
| C | -0.600003 | 2.131180  | 1.955214  |
| C | -1.537342 | 1.018570  | 1.843172  |
| C | 0.773448  | 1.643368  | 1.806777  |
| H | -2.612621 | 1.060812  | -1.968100 |
| H | -2.612621 | 1.060812  | 1.968100  |
| C | 0.887714  | 3.932779  | -2.060306 |
| C | 1.671933  | 2.788019  | -1.761615 |
| C | -0.507275 | 3.565168  | -2.092192 |
| C | 0.887714  | 3.932779  | 2.060306  |
| C | -0.507275 | 3.565168  | 2.092192  |
| C | 1.671933  | 2.788019  | 1.761615  |

## Electronic Supplementary Material (ESI) for New Journal of Chemistry

This journal is © The Royal Society of Chemistry and The Centre National de la Recherche Scientifique 2013

|   |           |          |           |
|---|-----------|----------|-----------|
| H | 2.754207  | 2.752330 | -1.713826 |
| H | 2.754207  | 2.752330 | 1.713826  |
| H | 1.270587  | 4.936950 | -2.208168 |
| H | 1.270587  | 4.936950 | 2.208168  |
| H | -1.328009 | 4.226917 | -2.342652 |
| H | -1.328009 | 4.226917 | 2.342652  |

### Intensities

=====

| Frequency<br>cm <sup>-1</sup> | Dipole Strength<br>1e-40 esu <sup>2</sup> cm <sup>2</sup> | Absorption Intensity<br>km/mole |
|-------------------------------|-----------------------------------------------------------|---------------------------------|
| -----                         | -----                                                     | -----                           |
| 45.135067                     | 161.180659                                                | 1.823497                        |
| 52.925142                     | 0.000000                                                  | 0.000000                        |
| 68.370205                     | 100.136751                                                | 1.716084                        |
| 73.135614                     | 0.741903                                                  | 0.013600                        |
| 95.067239                     | 1.409421                                                  | 0.033585                        |

### 3a-trans-T

|   |           |           |           |
|---|-----------|-----------|-----------|
| V | 0.486708  | -1.042004 | 0.000000  |
| V | -0.486708 | 1.042004  | 0.000000  |
| V | -0.246789 | -3.260338 | 0.000000  |
| V | 0.246789  | 3.260338  | 0.000000  |
| C | 0.686976  | -4.954521 | 0.000000  |
| C | -0.686976 | 4.954521  | 0.000000  |
| O | 1.276026  | -5.964206 | 0.000000  |
| O | -1.276026 | 5.964206  | 0.000000  |
| C | -0.881376 | -3.938490 | -2.052609 |
| C | -1.666098 | -2.793924 | -1.748903 |
| C | 0.513218  | -3.564949 | -2.105829 |
| C | -0.772471 | -1.647589 | -1.801743 |
| C | 0.600089  | -2.133551 | -1.974572 |
| C | -0.881376 | -3.938490 | 2.052609  |
| C | 0.513218  | -3.564949 | 2.105829  |
| C | -1.666098 | -2.793924 | 1.748903  |
| C | 0.600089  | -2.133551 | 1.974572  |
| C | -0.772471 | -1.647589 | 1.801743  |
| H | -1.263660 | -4.943299 | -2.197102 |
| H | -2.747965 | -2.762005 | -1.689801 |
| H | 1.333942  | -4.225284 | -2.360264 |
| H | -1.263660 | -4.943299 | 2.197102  |



**Electronic Supplementary Material (ESI) for New Journal of Chemistry**

This journal is © The Royal Society of Chemistry and The Centre National de la Recherche Scientifique 2013

|   |           |           |           |
|---|-----------|-----------|-----------|
| H | 1.333942  | -4.225284 | 2.360264  |
| H | -2.747965 | -2.762005 | 1.689801  |
| C | 0.717684  | 0.186773  | -1.834993 |
| C | 1.533366  | -1.021284 | -1.875968 |
| C | -0.717684 | -0.186773 | -1.834993 |
| C | 0.717684  | 0.186773  | 1.834993  |
| C | -0.717684 | -0.186773 | 1.834993  |
| C | 1.533366  | -1.021284 | 1.875968  |
| H | 2.608858  | -1.068076 | -2.002811 |
| H | 2.608858  | -1.068076 | 2.002811  |
| C | -0.600089 | 2.133551  | -1.974572 |
| C | 0.772471  | 1.647589  | -1.801743 |
| C | -1.533366 | 1.021284  | -1.875968 |
| C | -0.600089 | 2.133551  | 1.974572  |
| C | -1.533366 | 1.021284  | 1.875968  |
| C | 0.772471  | 1.647589  | 1.801743  |
| H | -2.608858 | 1.068076  | -2.002811 |
| H | -2.608858 | 1.068076  | 2.002811  |
| C | 0.881376  | 3.938490  | -2.052609 |
| C | 1.666098  | 2.793924  | -1.748903 |
| C | -0.513218 | 3.564949  | -2.105829 |
| C | 0.881376  | 3.938490  | 2.052609  |
| C | -0.513218 | 3.564949  | 2.105829  |
| C | 1.666098  | 2.793924  | 1.748903  |
| H | 2.747965  | 2.762005  | -1.689801 |
| H | 2.747965  | 2.762005  | 1.689801  |
| H | 1.263660  | 4.943299  | -2.197102 |
| H | 1.263660  | 4.943299  | 2.197102  |
| H | -1.333942 | 4.225284  | -2.360264 |
| H | -1.333942 | 4.225284  | 2.360264  |

Intensities

=====

| Frequency<br>cm <sup>-1</sup> | Dipole Strength<br>1e-40 esu <sup>2</sup> cm <sup>2</sup> | Absorption Intensity<br>km/mole |
|-------------------------------|-----------------------------------------------------------|---------------------------------|
| -----                         | -----                                                     | -----                           |
| 48.414137                     | 205.473659                                                | 2.493483                        |
| 58.186183                     | 0.000000                                                  | 0.000000                        |
| 70.499097                     | 5.928303                                                  | 0.104759                        |
| 84.171548                     | 66.698512                                                 | 1.407212                        |
| 91.622022                     | 2.198650                                                  | 0.050493                        |

**Electronic Supplementary Material (ESI) for New Journal of Chemistry**

This journal is © The Royal Society of Chemistry and The Centre National de la Recherche Scientifique 2013

**3b-S**

|   |           |           |           |
|---|-----------|-----------|-----------|
| V | 2.450294  | 0.009289  | -0.063782 |
| V | -2.450294 | -0.009289 | 0.063782  |
| V | 0.250662  | 1.069974  | 0.208000  |
| V | -0.250662 | -1.069974 | -0.208000 |
| C | 1.659578  | -2.099326 | 0.017312  |
| C | -1.659578 | 2.099326  | -0.017312 |
| O | 2.077739  | -3.208531 | -0.041642 |
| O | -2.077739 | 3.208531  | 0.041642  |
| C | 3.993687  | 0.140925  | -1.667056 |
| C | 3.110180  | -0.921935 | -2.006513 |
| C | 3.266596  | 1.377499  | -1.602972 |
| C | 1.816859  | -0.337680 | -2.196719 |
| C | 1.904066  | 1.099962  | -1.953346 |
| C | 3.912549  | 0.196724  | 1.656664  |
| C | 3.207124  | 1.432887  | 1.616512  |
| C | 3.006559  | -0.883094 | 1.912468  |
| C | 1.831591  | 1.160204  | 1.940617  |
| C | 1.716676  | -0.285559 | 2.081141  |
| H | 5.057144  | 0.029736  | -1.479642 |
| H | 3.384165  | -1.963617 | -2.123416 |
| H | 3.694693  | 2.347906  | -1.374807 |
| H | 4.980238  | 0.085799  | 1.493471  |
| H | 3.651865  | 2.407785  | 1.447111  |
| H | 3.273769  | -1.922892 | 2.053792  |
| C | -0.310709 | 0.592998  | -2.163287 |
| C | 0.575825  | 1.698013  | -1.933961 |
| C | 0.404400  | -0.671978 | -2.307353 |
| C | -0.404400 | 0.671978  | 2.307353  |
| C | 0.310709  | -0.592998 | 2.163287  |
| C | 0.513689  | 1.781796  | 2.166780  |
| H | 0.334090  | 2.744232  | -2.095420 |
| H | 0.332018  | 2.833092  | 2.363024  |
| C | -1.831591 | -1.160204 | -1.940617 |
| C | -1.716676 | 0.285559  | -2.081141 |
| C | -0.513689 | -1.781796 | -2.166780 |
| C | -1.904066 | -1.099962 | 1.953346  |
| C | -0.575825 | -1.698013 | 1.933961  |
| C | -1.816859 | 0.337680  | 2.196719  |
| H | -0.332018 | -2.833092 | -2.363024 |
| H | -0.334090 | -2.744232 | 2.095420  |
| C | -3.912549 | -0.196724 | -1.656664 |
| C | -3.006559 | 0.883094  | -1.912468 |

## Electronic Supplementary Material (ESI) for New Journal of Chemistry

This journal is © The Royal Society of Chemistry and The Centre National de la Recherche Scientifique 2013

|   |           |           |           |
|---|-----------|-----------|-----------|
| C | -3.207124 | -1.432887 | -1.616512 |
| C | -3.993687 | -0.140925 | 1.667056  |
| C | -3.266596 | -1.377499 | 1.602972  |
| C | -3.110180 | 0.921935  | 2.006513  |
| H | -3.273769 | 1.922892  | -2.053792 |
| H | -3.384165 | 1.963617  | 2.123416  |
| H | -4.980238 | -0.085799 | -1.493471 |
| H | -5.057144 | -0.029736 | 1.479642  |
| H | -3.651865 | -2.407785 | -1.447111 |
| H | -3.694693 | -2.347906 | 1.374807  |

### Intensities

=====

| Frequency<br>cm <sup>-1</sup> | Dipole Strength<br>1e-40 esu <sup>2</sup> cm <sup>2</sup> | Absorption Intensity<br>km/mole |
|-------------------------------|-----------------------------------------------------------|---------------------------------|
| -----                         | -----                                                     | -----                           |
| 68.286345                     | 615.833528                                                | 10.540841                       |
| 69.449959                     | 72.223989                                                 | 1.257279                        |
| 102.926412                    | 0.000000                                                  | 0.000000                        |
| 119.076911                    | 0.000000                                                  | 0.000000                        |
| 123.842088                    | 107.060177                                                | 3.323336                        |

### 3b-T

|   |           |           |           |
|---|-----------|-----------|-----------|
| V | 2.503389  | -0.148326 | -0.000925 |
| V | -2.560891 | 0.127629  | 0.000365  |
| V | -0.046812 | 1.521941  | 0.015646  |
| V | -0.084183 | -0.751393 | -0.008045 |
| C | 2.121211  | -2.056251 | -0.020856 |
| C | -2.152258 | 2.014567  | 0.019781  |
| O | 2.130598  | -3.232106 | -0.033066 |
| O | -1.834781 | 3.175527  | 0.031157  |
| C | 3.985925  | 0.131814  | -1.655170 |
| C | 3.106742  | -0.945795 | -1.981856 |
| C | 3.239374  | 1.351070  | -1.603403 |
| C | 1.785762  | -0.381788 | -2.104414 |
| C | 1.884434  | 1.059372  | -1.928521 |
| C | 3.985133  | 0.097605  | 1.659592  |
| C | 3.238558  | 1.317627  | 1.632788  |
| C | 3.105822  | -0.986613 | 1.963314  |
| C | 1.883428  | 1.019201  | 1.950996  |
| C | 1.784740  | -0.425295 | 2.096857  |

**Electronic Supplementary Material (ESI) for New Journal of Chemistry**

This journal is © The Royal Society of Chemistry and The Centre National de la Recherche Scientifique 2013

|   |           |           |           |
|---|-----------|-----------|-----------|
| H | 5.057569  | 0.042129  | -1.511156 |
| H | 3.408519  | -1.967640 | -2.178988 |
| H | 3.657240  | 2.329742  | -1.387413 |
| H | 5.056882  | 0.011081  | 1.514341  |
| H | 3.656626  | 2.300557  | 1.437524  |
| H | 3.407519  | -2.012340 | 2.139308  |
| C | -0.330141 | 0.554883  | -2.178330 |
| C | 0.568633  | 1.703861  | -2.015510 |
| C | 0.370750  | -0.716270 | -2.186290 |
| C | -0.331303 | 0.509552  | 2.188884  |
| C | 0.369719  | -0.761423 | 2.170805  |
| C | 0.567513  | 1.661697  | 2.050562  |
| H | 0.409912  | 2.669526  | -2.498626 |
| H | 0.408482  | 2.616983  | 2.553792  |
| C | -1.855030 | -1.163196 | -1.820870 |
| C | -1.745811 | 0.256266  | -2.120645 |
| C | -0.542177 | -1.800928 | -1.888410 |
| C | -1.855775 | -1.200782 | 1.794698  |
| C | -0.542910 | -1.839677 | 1.849889  |
| C | -1.746939 | 0.212119  | 2.124077  |
| H | -0.354621 | -2.865097 | -1.979495 |
| H | -0.355248 | -2.905489 | 1.918748  |
| C | -3.965111 | -0.186034 | -1.710391 |
| C | -3.049102 | 0.844669  | -2.076208 |
| C | -3.240164 | -1.410223 | -1.526113 |
| C | -3.965956 | -0.221891 | 1.703396  |
| C | -3.240683 | -1.441839 | 1.493912  |
| C | -3.050322 | 0.801086  | 2.091210  |
| H | -3.316070 | 1.867993  | -2.314465 |
| H | -3.317625 | 1.819160  | 2.350638  |
| H | -5.040785 | -0.069692 | -1.630564 |
| H | -5.041607 | -0.104111 | 1.625485  |
| H | -3.688104 | -2.367866 | -1.285098 |
| H | -3.688293 | -2.394302 | 1.232593  |

Intensities

=====

| Frequency<br>cm <sup>-1</sup> | Dipole Strength<br>1e-40 esu <sup>2</sup> cm <sup>2</sup> | Absorption Intensity<br>km/mole |
|-------------------------------|-----------------------------------------------------------|---------------------------------|
| -----                         | -----                                                     | -----                           |
| 74.697405                     | 25.402584                                                 | 0.475622                        |
| 97.270456                     | 94.363930                                                 | 2.300727                        |
| 112.051312                    | 3.396138                                                  | 0.095385                        |

**Electronic Supplementary Material (ESI) for New Journal of Chemistry**

**This journal is © The Royal Society of Chemistry and The Centre National de la Recherche Scientifique 2013**

|            |          |          |
|------------|----------|----------|
| 121.771879 | 1.875014 | 0.057231 |
| 129.228012 | 1.649845 | 0.053441 |
